# Supplementary material
Source: publisher site journal article supplement (https://www.spandidos-publications.com/8250/downloadSupplementary)

Figure S1. Rat chondrocytes were identified by IF staining of COL2A1. Primary rat chondrocytes were extracted and identified as chondrocytes by IF staining of COL2A1. COL2A1, type II collagen; IF, immunofluorescence.

IF-COL2A1DAPI

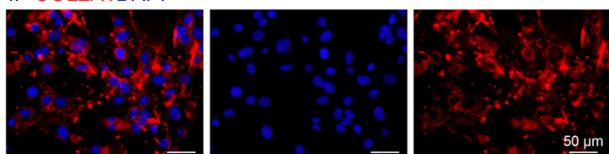

Figure S2. Total and phosphorylated levels of HDAC1/2/8 expression in the acetabular cartilage of the rats with DDH. Semi-quantification of the images in Fig. 5C. Data are presented as the mean  $\pm$  SD. \*\*\*P<0.001. Representative results of three independent experiments are shown. DDH, developmental dysplasia of the hip; HDAC, histone deacetylase; IOD, integrated optical density; p-, phosphorylated.

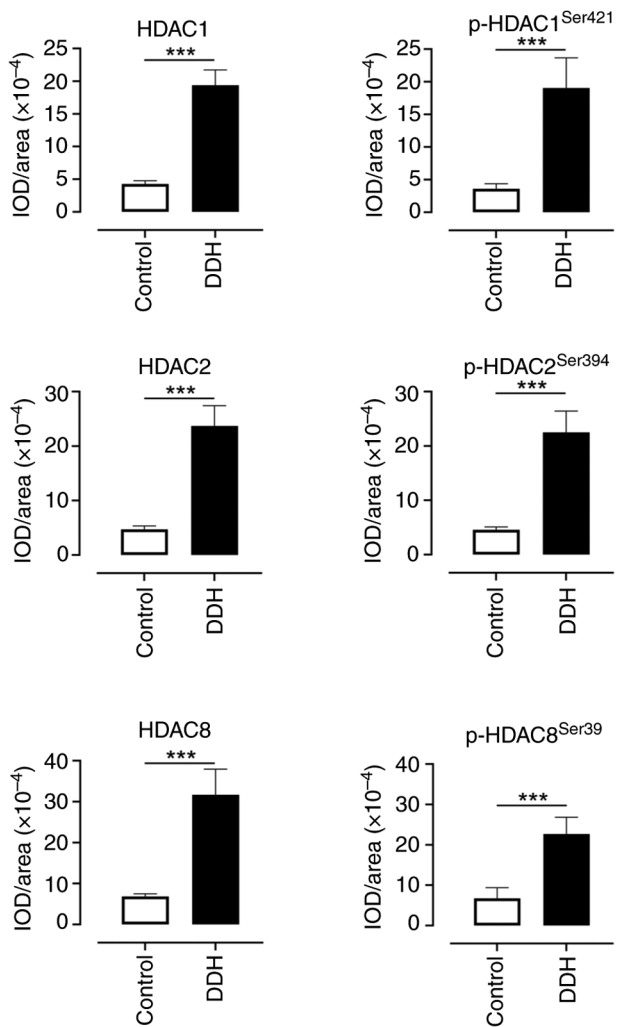

Figure S3. Expression levels of HDAC1, HDAC2 and HDAC8 in chondrocytes. Adenovirus-mediated shRNAs against HDAC1, HDAC2 and HDAC8 were constructed and used to infect chondrocytes. After 24 h, the protein expression levels of HDAC1, HDAC2 and HDAC8 in chondrocytes were effectively knocked down. HDAC, histone deacetylase; NC, negative control; sh, short hairpin.

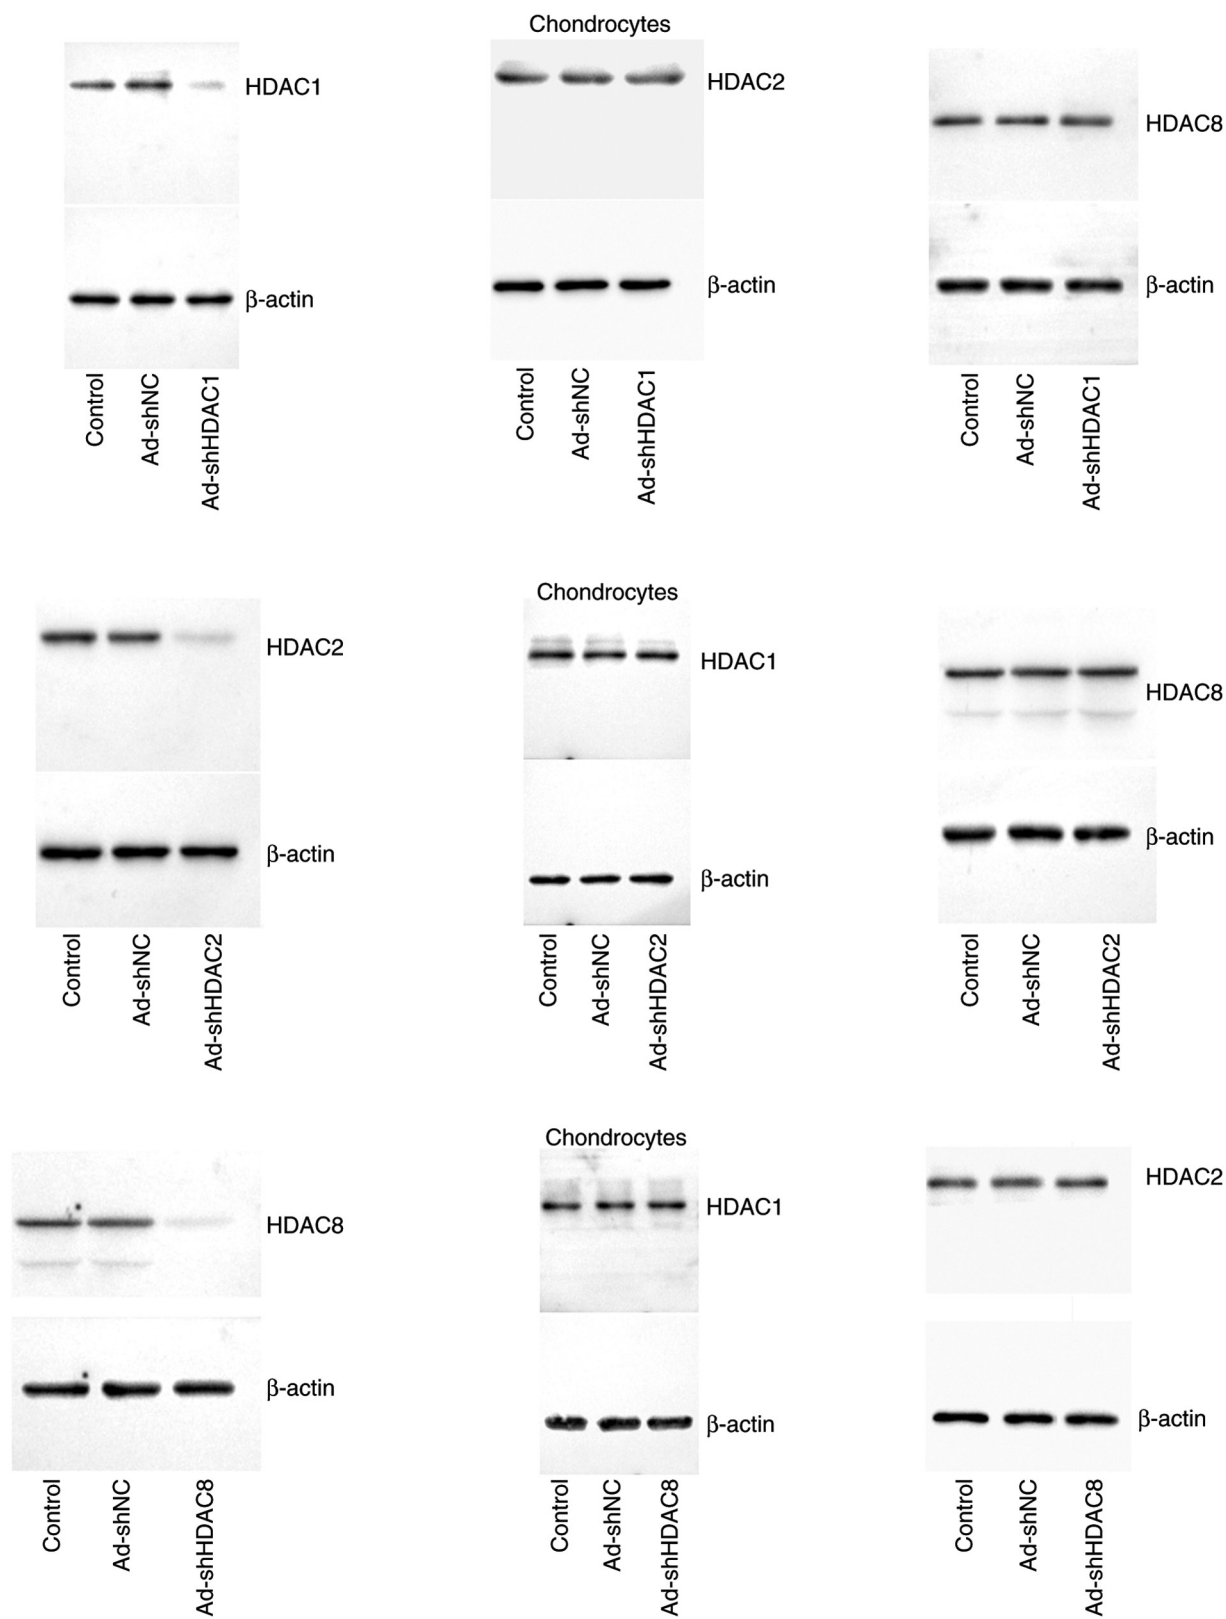

Figure S4. Expression levels of  $\beta$ -catenin in the acetabular cartilages of rats with DDH. The protein expression levels of  $\beta$ -catenin in the acetabular cartilage were detected by western blotting. Data are presented as the mean  $\pm$  SD. \*\*\* $P < 0.001$ . Representative results of four independent experiments are shown. DDH, developmental dysplasia of the hip

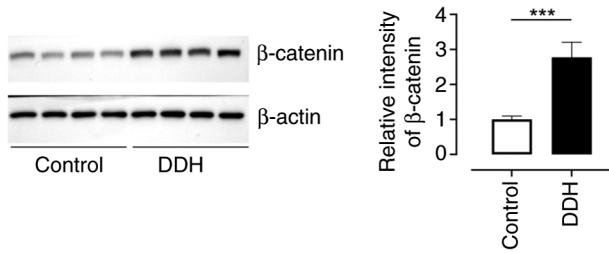

Supplement: Supplementary file [file downloadSupplementary]
